# Supplementary material for: Lead ion induced chemodosimeter approach of a tripodal hydroxyl-quinoline based phospho-ester through P–O bond cleavage
Source: Royal Society of Chemistry journal article supplement (doi:10.1039/c6dt00941g), 2016-01-01

## Electronic Supplementary Information

### Lead ion induced chemodosimeter approach of a tripodal hydroxyl-quinoline based phospho-ester through P-O bond cleavage

Dibyendu Sain,<sup>a</sup> Chanda Kumari,<sup>a</sup> Ashish Kumar,<sup>a</sup> Hari Pada Nayek<sup>a</sup> and Swapan Dey<sup>\*a</sup>

Department of Applied Chemistry, Indian School of Mines, Dhanbad, Jharkhand, 826 004, India, [dey.s.ac@ismdhanbad.ac.in](mailto:dey.s.ac@ismdhanbad.ac.in), Fax: +913262296563

**Table S1: Crystallographic data for HQP, NP and Pb<sub>4</sub>(HQ)<sub>6</sub>(ClO<sub>4</sub>)<sub>2</sub>:**

|                                                 | HQP                                                             | NP                                               | Pb <sub>4</sub> (HQ) <sub>6</sub> (ClO <sub>4</sub> ) <sub>2</sub>                             |
|-------------------------------------------------|-----------------------------------------------------------------|--------------------------------------------------|------------------------------------------------------------------------------------------------|
| CCDC ref. no.                                   | <b>1413010</b>                                                  | <b>1413012</b>                                   | <b>1413011</b>                                                                                 |
| Formula                                         | C <sub>27</sub> H <sub>18</sub> N <sub>3</sub> O <sub>4</sub> P | C <sub>30</sub> H <sub>21</sub> O <sub>4</sub> P | C <sub>54</sub> H <sub>36</sub> Cl <sub>2</sub> N <sub>6</sub> O <sub>14</sub> Pb <sub>4</sub> |
| Formula Weight                                  | 479.41                                                          | 476.44                                           | 1892.55                                                                                        |
| Crystal size (mm)                               | 0.16 x 0.14 x 0.10                                              | 0.24 x 0.17 x 0.11                               | 0.20 x 0.14 x 0.10                                                                             |
| Temperature (K)                                 | 293(2)                                                          | 293(2)                                           | 293(2)                                                                                         |
| Crystal System                                  | Cubic                                                           | Monoclinic                                       | Triclinic                                                                                      |
| Space group                                     | P 213                                                           | P 21/c                                           | P -1                                                                                           |
| a (Å)                                           | 13.3936(15)                                                     | 13.7844(15)                                      | 10.247                                                                                         |
| b (Å)                                           | 13.3936(15)                                                     | 9.8719(11)                                       | 11.756                                                                                         |
| c (Å)                                           | 13.3936(15)                                                     | 21.2839(19)                                      | 12.669                                                                                         |
| α (°)                                           | 90.00                                                           | 90.00                                            | 65.39                                                                                          |
| β (°)                                           | 90.00                                                           | 125.688(5)                                       | 75.83                                                                                          |
| γ (°)                                           | 90.00                                                           | 90.00                                            | 82.73                                                                                          |
| V [Å <sup>3</sup> ]                             | 2402.7(5)                                                       | 2352.4(4)                                        | 1344.8                                                                                         |
| Z                                               | 4                                                               | 4                                                | 1                                                                                              |
| D <sub>calc</sub> [g/cm <sup>3</sup> ]          | 1.325                                                           | 1.345                                            | 2.337                                                                                          |
| μ(Mo-Kα) [mm <sup>-1</sup> ]                    | 0.153                                                           | 0.153                                            | 12.654                                                                                         |
| F(000)                                          | 992                                                             | 992                                              | 876                                                                                            |
| Radiation [Å]: Mo-Kα                            | 0.71073                                                         | 0.71073                                          | 0.71073                                                                                        |
| θ <sub>Min-Max</sub> [°]:                       | 5.49, 27.41                                                     | 0.982, 27.64                                     | 0.959, 27.00                                                                                   |
| Dataset:                                        | -3 ≤ h ≤ 11<br>-3 ≤ k ≤ 17<br>-15 ≤ l ≤ 17                      | -17 ≤ h ≤ 17<br>-11 ≤ k ≤ 12<br>-27 ≤ l ≤ 27     | -12 ≤ h ≤ 13<br>-15 ≤ k ≤ 14<br>-15 ≤ l ≤ 16                                                   |
| Total reflections                               | 1636                                                            | 5372                                             | 5615                                                                                           |
| Unique reflections                              | 1299                                                            | 3275                                             | 3795                                                                                           |
| Observed data [I > 2σ(I)]                       | 1299                                                            | 3275                                             | 3795                                                                                           |
| Refinement: N <sub>ref</sub> , N <sub>par</sub> | 1636, 106                                                       | 5372, 316                                        | 5615, 361                                                                                      |
| R (int)                                         | 0.0490                                                          | 0.0487                                           | 0.0383                                                                                         |
| wR2 (all data), S                               | 0.1293, 0.854                                                   | 0.1083, 1.016                                    | 0.0790, 1.050                                                                                  |
| Max. & Av. Shift/Error                          | 0.045, 0.010                                                    | 0.000, 0.000                                     | 0.000, 0.000                                                                                   |
| Resd. Dens. [e/ Å <sup>3</sup> ]                | -0.209, 0.196                                                   | -0.278, 0.273                                    | -1.989, 1.345                                                                                  |

**Table S2:** Short contacts (Å) for the structure of  $Pb_4(HQ)_6(ClO_4)_2$ .

| Short Contacts | Distance (Å) |
|----------------|--------------|
| C11–O6 ⋯ Pb2   | 3.000        |
| C11–O6 ⋯ Pb1   | 3.153        |
| C11–O7 ⋯ Pb1   | 3.232        |
| C11–O7 ⋯ H1–C1 | 2.528        |
| C11–O6 ⋯ H7–C7 | 2.637        |

**$^1H$  NMR spectrum of HQP:**

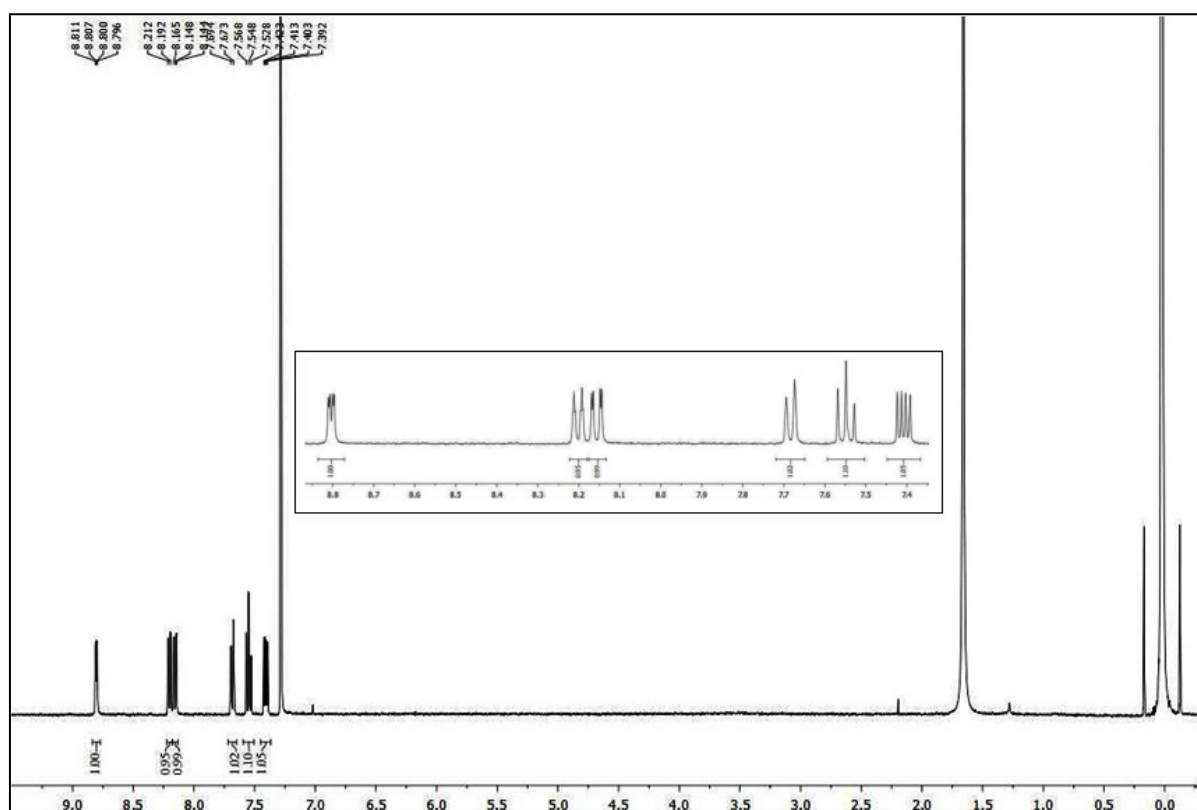

**<sup>13</sup>C NMR spectrum of HQP:**

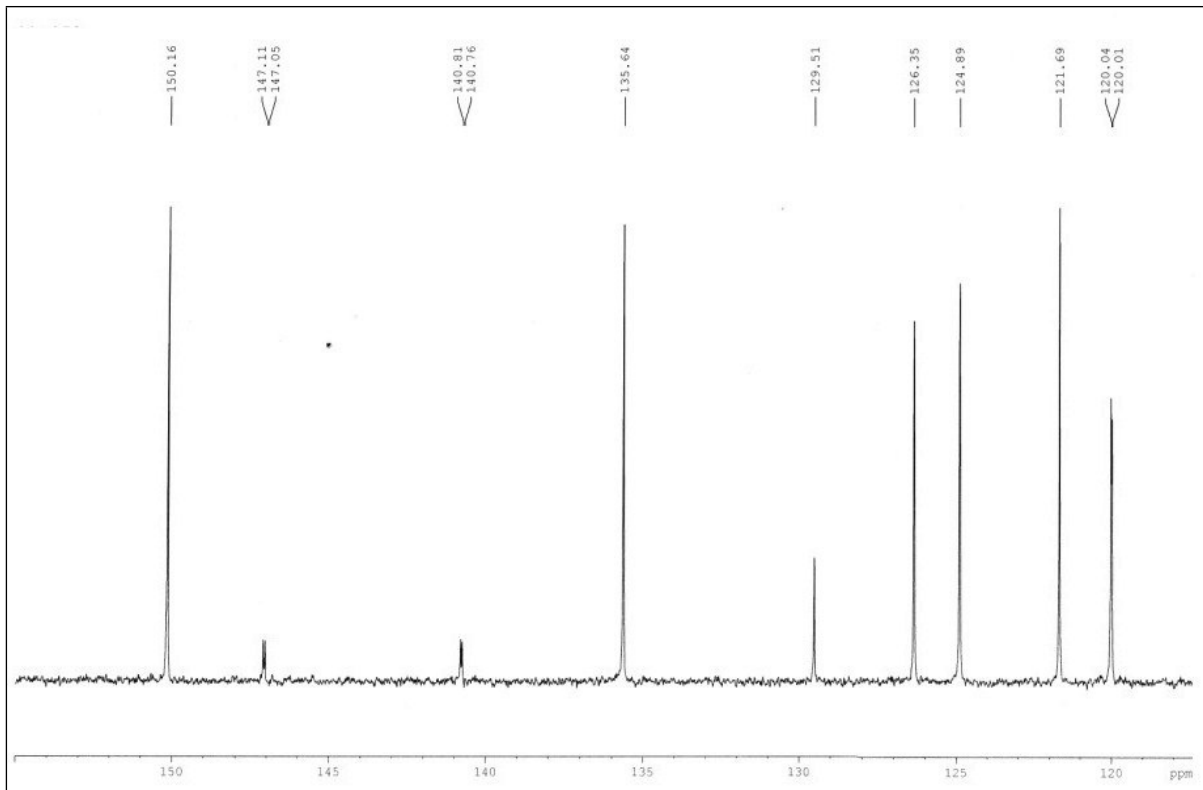

**Mass spectrum of HQP:**

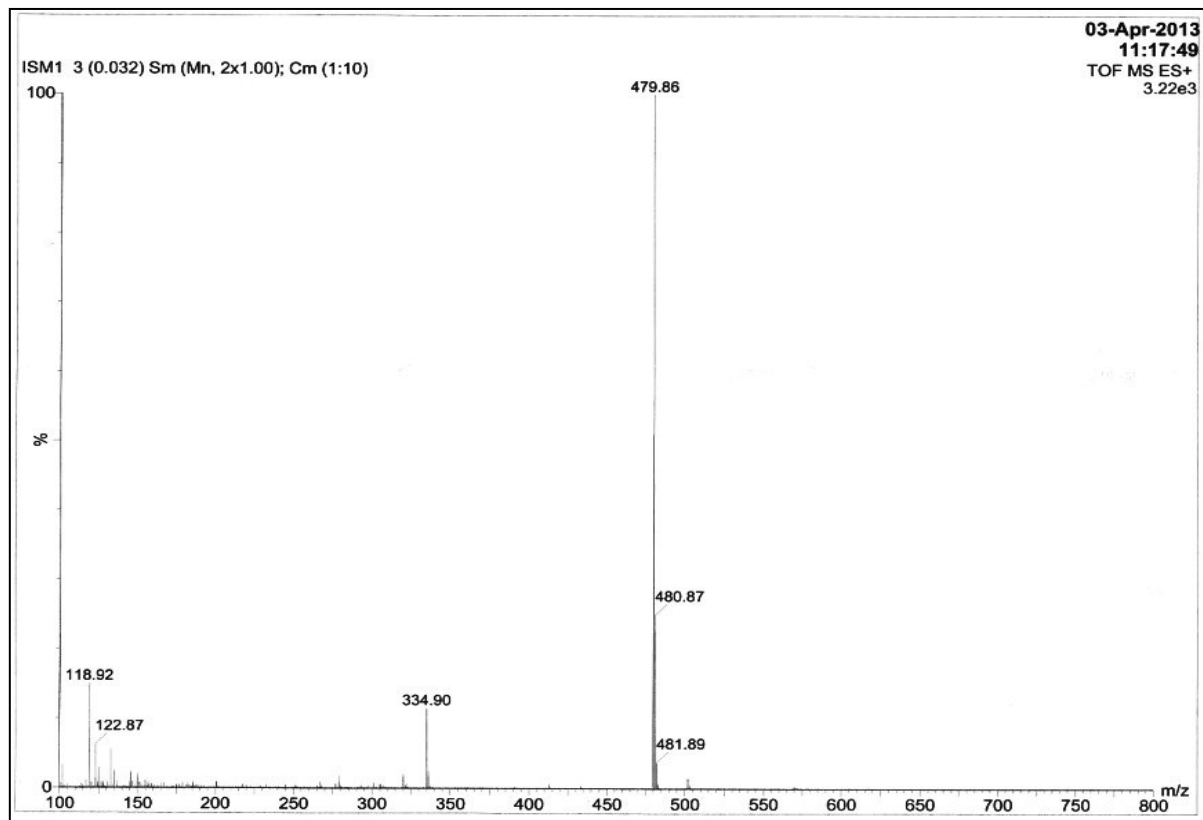

**IR spectrum of HQP:**

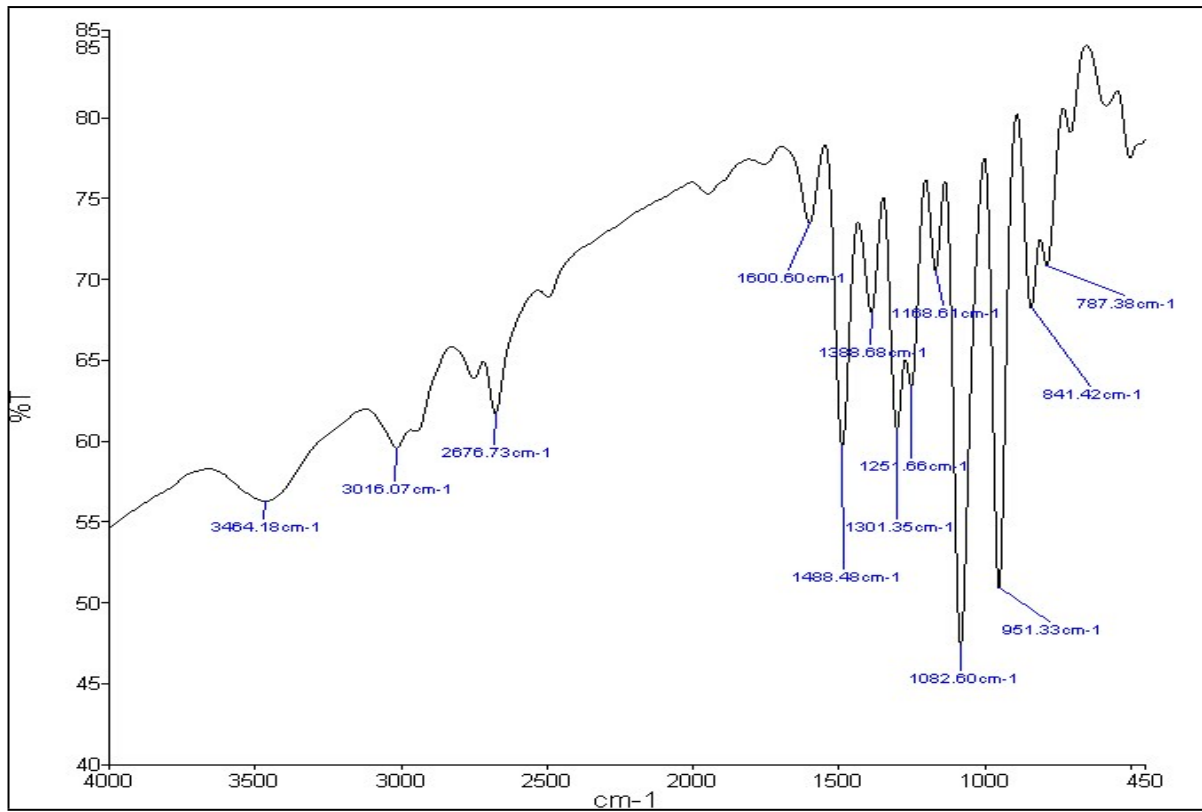

**<sup>1</sup>H NMR spectrum of NP:**

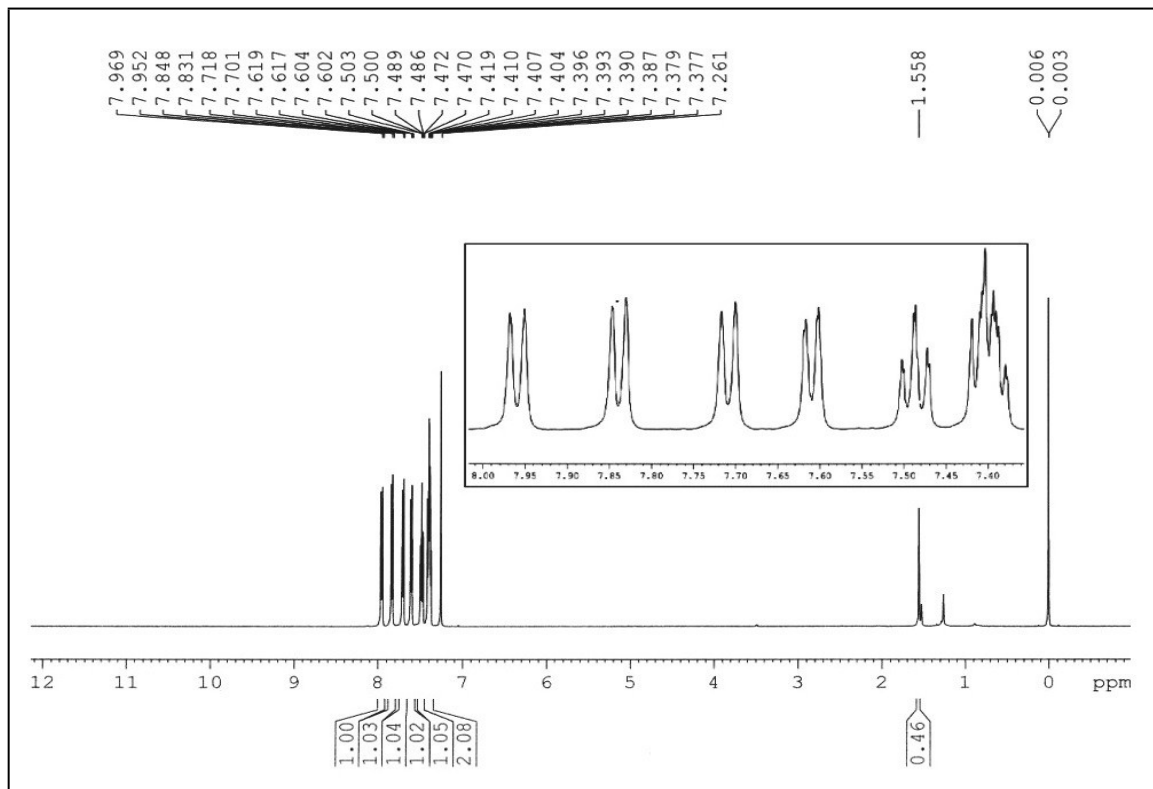

**$^{13}\text{C}$  NMR spectrum of NP:**

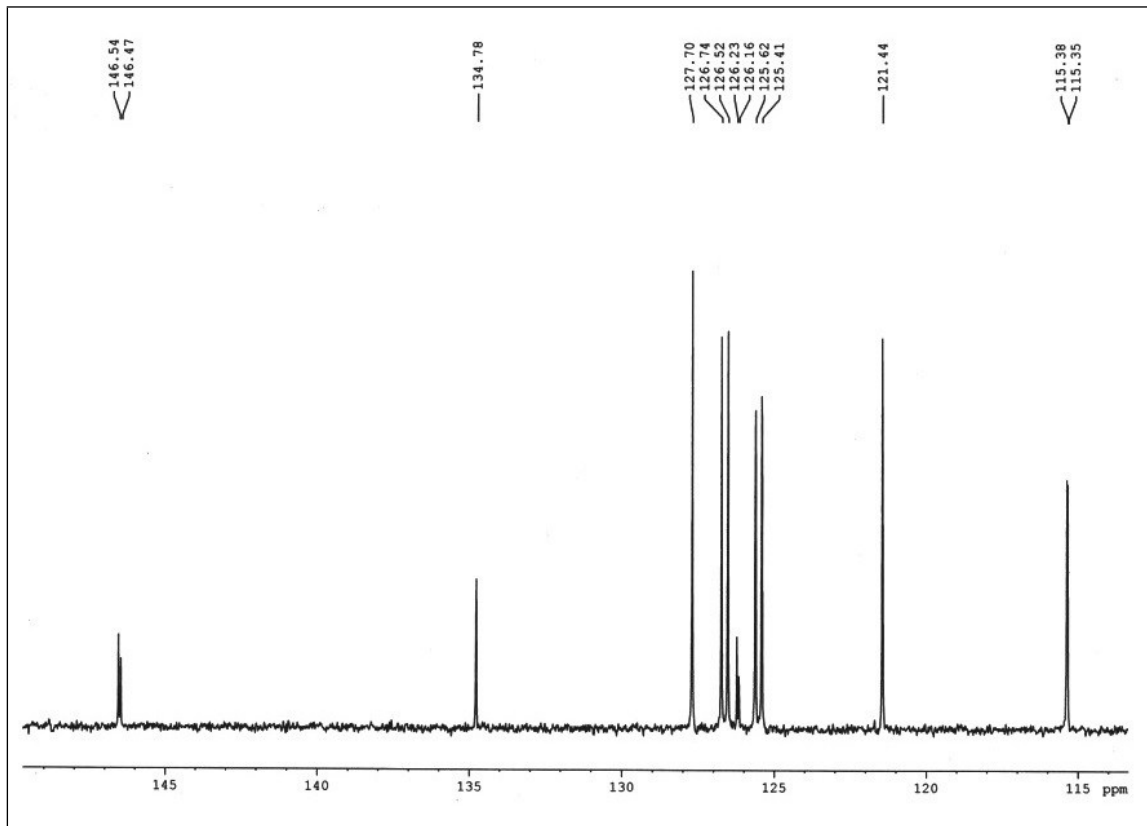

**Mass spectrum of NP:**

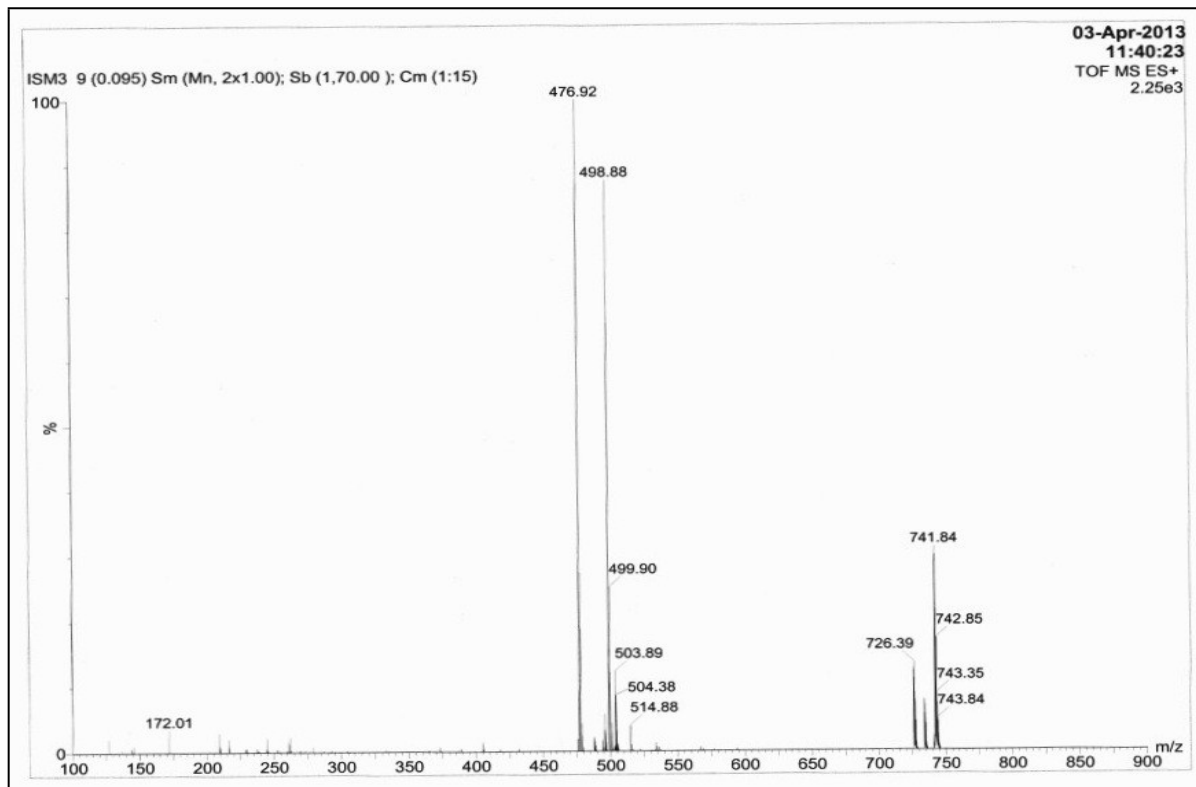

## IR spectrum of NP:

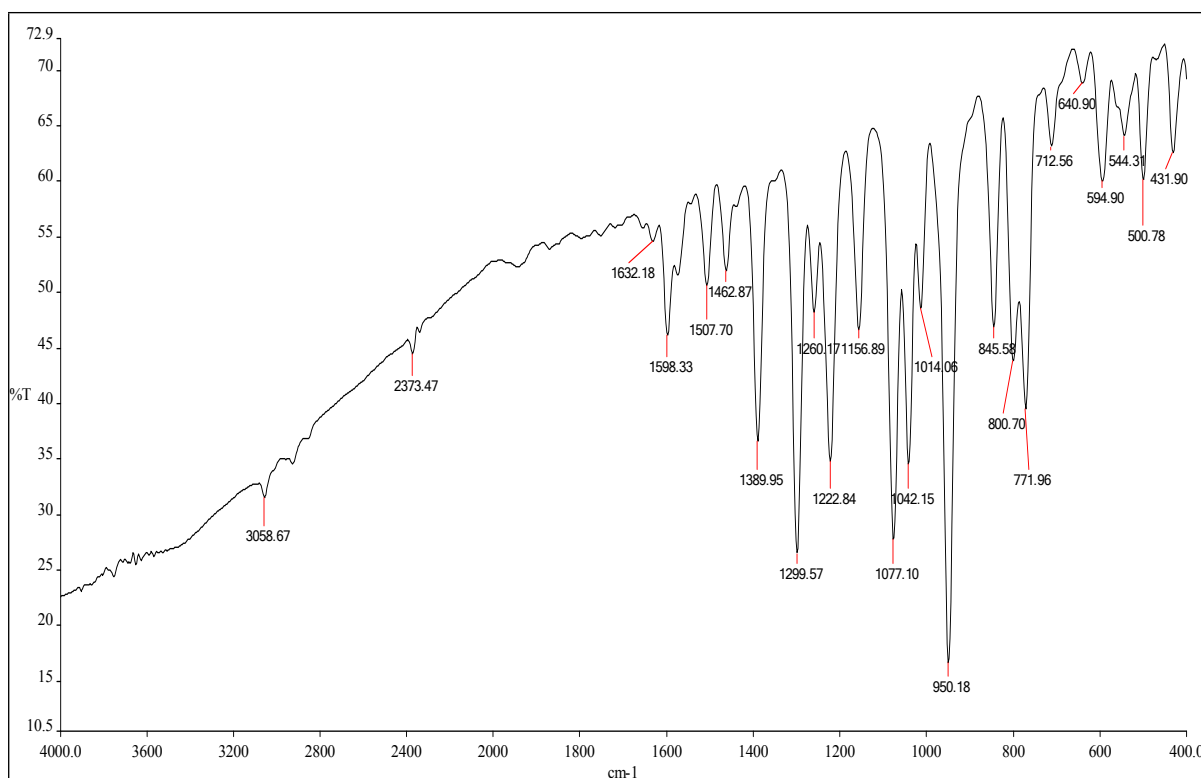

### Calculation of limit of detection (LOD):

The detection limit of **HQP** for **Pb<sup>2+</sup>** was calculated on the basis of fluorescence titration. To determine the standard deviation for the fluorescence intensity, the emission intensity of **HQP** without any anion was measured by 10 times and the standard deviation of blank measurements was calculated.

The limit of detection (LOD) of **HQP** for sensing **Pb<sup>2+</sup>** was determined from the following equation:

$$\text{LOD} = K \times \text{SD}/S$$

Where  $K = 2$  or  $3$  (we take  $3$  in this case);  $SD$  is the standard deviation of the blank receptor (**HQP**) solution;  $S$  is the slope of the calibration curve.

### For **HQP** with **Pb<sup>2+</sup>**:

From the linear fit graph we get slope =  $1.02786 \times 10^7$ , and  $SD$  value is  $0.50284$ . Thus using the above formula we get the Limit of Detection =  $1.467 \times 10^{-7}$  M i.e. **HQP** can detect **Pb<sup>2+</sup>** up to this very lower concentration by fluorescence techniques.

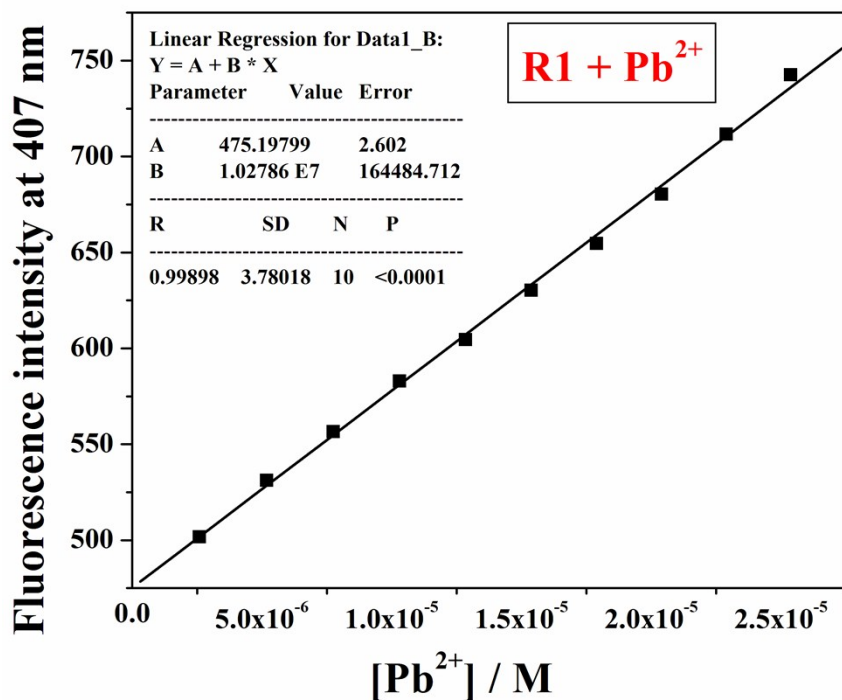

**Calculation of association constant (K):**

Association constant of **HQP** with **Pb<sup>2+</sup>** ( $K = 1.23 \times 10^5 \text{ M}^{-1}$ ) from UV titration data using non-linear method [following non-linear curve fitting equation:  $Y = (I_0 + A.K.X) / (1 + K.X)$ , where  $X = [\text{Pb}^{2+}]$ ,  $Y =$  intensity of UV Vis absorption,  $I_0 =$  initial intensity of HQP].

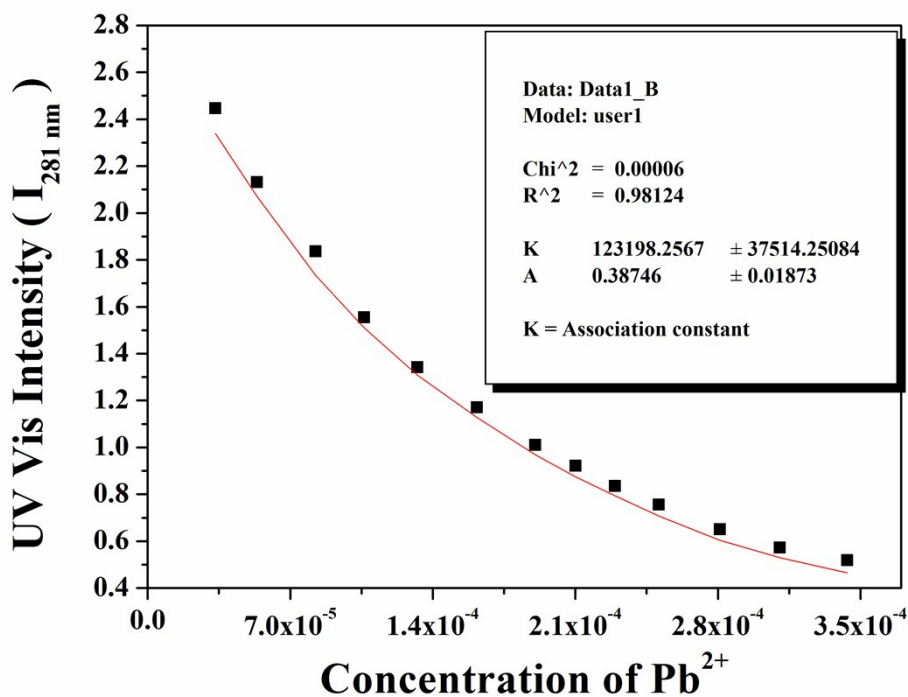

Supplement: c6dt00941g1.pdf [file c6dt00941g1.pdf]
